# Supplementary material for: Proteomics Evaluation of Semen of Clinically Healthy Beagle-Breed Dogs
Source: MDPI journal article supplement (doi:10.3390/vetsci9120697), 2022-12-15
Supplement: s1 [file s1]

# Proteomics Evaluation of Semen of Clinically Healthy Beagle-Breed Dogs

Pagona G. Gouletsou <sup>1,†</sup>, George Th. Tsangaris <sup>2,†</sup>, Eleni I. Katsarou <sup>1</sup>, Maria V. Bourganou <sup>3</sup>, Mariana S. Barbagianni <sup>1</sup>, Athina P. Venianaki <sup>1</sup>, Efterpi Bouroutzika <sup>2</sup>, Athanasios K. Anagnostopoulos <sup>2</sup>, George C. Fthenakis <sup>1</sup> and Angeliki I. Katsafadou <sup>3,\*</sup>

**Table S1.** Results of blood flow profile parameters in Doppler mode examination of dogs into the study.

| Parameter                                    | Median (min. – max.) |
|----------------------------------------------|----------------------|
| Resistance index                             | 0.61 (0.53 – 0.67)   |
| Pulsatility index                            | 1.02 (0.70 – 1.25)   |
| Peak systolic velocity (cm s <sup>-1</sup> ) | 13.2 (12.4 – 14.1)   |
| Mean velocity (cm s <sup>-1</sup> )          | 6.9 (6.0 – 7.9)      |
| End diastolic velocity (cm s <sup>-1</sup> ) | 5.3 (4.2 – 6.8)      |
| Acceleration (m s <sup>-2</sup> )            | 1.06 (0.95 – 1.17)   |
| Ratio of systolic / diastolic velocity       | 2.65 (1.76 – 3.20)   |
| Blood flow (mL min <sup>-1</sup> )           | 9 (4 – 12)           |

**Table S2.** Proteins (*n* = 59) identified in blood plasma from male dogs (protein identification by LC-MS/MS) (in alphabetical order).

| Accession No. | Description name                                                 | Gene Name | Coverage | Pro-<br>teins | Unique<br>Peptides | Pep-<br>tides | PSMs <sup>1</sup> | Area                 | AA <sub>s</sub> <sup>2</sup> | MW <sup>3</sup><br>[kDa] | calc. pI <sup>4</sup> |
|---------------|------------------------------------------------------------------|-----------|----------|---------------|--------------------|---------------|-------------------|----------------------|------------------------------|--------------------------|-----------------------|
| Q5TJF5        | (3R)-3-hydroxyacyl-CoA dehydrogenase                             | HSD17B8   | 7.72     | 1             | 1                  | 1             | 1                 | 1.623E7 <sup>5</sup> | 259                          | 26.7                     | 7.25                  |
| E2QXF3        | 60S ribosomal protein L15                                        | RPL15     | 8.82     | 1             | 1                  | 1             | 2                 | 2.073E8              | 204                          | 24.1                     | 11.62                 |
| P62286        | Abnormal spindle-like microcephaly-associated protein<br>homolog | ASPM      | 1.96     | 1             | 4                  | 4             | 25                | 1.489E9              | 3469                         | 407.3                    | 10.61                 |
| Q8HY67        | Acidic leucine-rich nuclear phosphoprotein 32 family member<br>A | ANP32A    | 4.42     | 1             | 1                  | 1             | 1                 | 2.148E8              | 249                          | 28.5                     | 4.11                  |
| O18840        | Actin, cytoplasmic 1                                             | ACTB      | 36.27    | 1             | 11                 | 11            | 11                | 1.521E8              | 375                          | 41.7                     | 5.48                  |
| Q29471        | Annexin A13                                                      | ALB       | 7.07     | 1             | 8                  | 8             | 312               | 2.752E9              | 608                          | 68.6                     | 5.69                  |
| P02648        | Apolipoprotein A-I                                               | ANXA13    | 3.48     | 1             | 1                  | 1             | 5                 | 4.267E8              | 316                          | 35.5                     | 5.67                  |
| P09582        | Arginine esterase                                                | APOA1     | 14.29    | 1             | 3                  | 3             | 42                | 2.963E8              | 266                          | 30.2                     | 5.30                  |
| Q32KH9        | Arylsulfatase G                                                  | N/A       | 13.46    | 1             | 5                  | 5             | 382               | 5.297E8              | 260                          | 28.7                     | 7.78                  |
| A1E2V0        | Baculoviral IAP repeat-containing protein 3                      | ARSG      | 2.99     | 1             | 1                  | 1             | 3                 |                      | 535                          | 58.2                     | 6.74                  |
| Q5TJE8        | Beta-1,3-galactosyltransferase 4                                 | BIRC3     | 2.65     | 1             | 1                  | 1             | 4                 | 2.530E9              | 604                          | 67.9                     | 6.20                  |
| Q95153        | Breast cancer type 1 susceptibility protein homolog              | B3GALT4   | 2.35     | 1             | 1                  | 1             | 1                 | 1.857E7              | 383                          | 42.4                     | 8.72                  |
| E2RA18        | Calmegin                                                         | BRCA1     | 0.59     | 1             | 1                  | 1             | 1                 |                      | 1878                         | 208.3                    | 5.59                  |
| P24643        | Calnexin                                                         | CLGN      | 2.90     | 1             | 1                  | 1             | 1                 |                      | 620                          | 70.9                     | 4.67                  |
| O77746        | cGMP-specific 3',5'-cyclic phosphodiesterase                     | CANX      | 1.69     | 1             | 1                  | 1             | 1                 | 4.303E8              | 593                          | 67.6                     | 4.61                  |
| P25473        | Clusterin                                                        | PDE5A     | 3.12     | 1             | 1                  | 1             | 1                 |                      | 865                          | 98.2                     | 6.06                  |
| E2R1I5        | Coiled-coil domain-containing protein 39                         | CLU       | 1.80     | 1             | 1                  | 1             | 1                 |                      | 445                          | 51.8                     | 5.91                  |
| Q3LSL6        | C-X-C chemokine receptor type 4                                  | CCDC39    | 1.06     | 1             | 1                  | 1             | 53                | 1.004E9              | 939                          | 110.3                    | 6.61                  |
| Q8WN22        | DNA-dependent protein kinase catalytic subunit                   | CXCR4     | 1.70     | 1             | 1                  | 1             | 14                | 2.287E7              | 353                          | 40.1                     | 8.21                  |
| P41148        | Endoplasmin                                                      | PRKDC     | 0.24     | 1             | 1                  | 1             | 1                 | 4.491E7              | 4144                         | 472.8                    | 7.23                  |
| Q9GL25        | Epididymal sperm-binding protein 1                               | HSP90B1   | 9.58     | 1             | 6                  | 6             | 6                 | 4.362E7              | 804                          | 92.5                     | 4.87                  |
| P68213        | Fibrinogen alpha chain                                           | ELSPBP1   | 9.80     | 1             | 1                  | 1             | 1                 | 2.091E7              | 245                          | 28.7                     | 7.40                  |
| P02677        | Fibrinogen beta chain (Fragment)                                 | FGA       | 67.86    | 1             | 2                  | 2             | 4                 | 4.049E8              | 28                           | 3.0                      | 6.46                  |
| Q659K0        | G2/mitotic-specific cyclin-B3                                    | FGB       | 61.29    | 1             | 1                  | 1             | 1                 | 1.677E7              | 31                           | 3.7                      | 5.00                  |
| A2IBY7        | Gamma-crystallin S                                               | CCNB3     | 1.43     | 1             | 1                  | 1             | 1435              | 44.69E9              | 1330                         | 152.0                    | 8.94                  |
| A0PA85        | Glutamate decarboxylase 1                                        | CRYGS     | 7.87     | 1             | 1                  | 1             | 2                 | 5.263E9              | 178                          | 21.0                     | 6.86                  |
| Q28259        | Glyceraldehyde-3-phosphate dehydrogenase                         | GAD1      | 3.37     | 1             | 1                  | 1             | 1                 | 2.058E8              | 594                          | 66.8                     | 7.31                  |
| Q7YQC6        | Heat shock 70 kDa protein 1                                      | GAPDH     | 4.50     | 1             | 1                  | 1             | 1                 | 3.607E8              | 333                          | 35.8                     | 8.12                  |
| P60529        | Hemoglobin subunit alpha                                         | HSPA1     | 1.72     | 1             | 1                  | 1             | 2                 | 2.169E8              | 641                          | 70.0                     | 5.66                  |
| P60524        | Hemoglobin subunit beta                                          | HBA       | 11.35    | 1             | 2                  | 2             | 3                 | 9.449E6              | 141                          | 15.2                     | 8.06                  |
| P01784        | Ig heavy chain V region GOM                                      | HBB       | 5.48     | 1             | 1                  | 1             | 1                 | 1.473E7              | 146                          | 16.0                     | 8.05                  |
| Q95LF0        | Interleukin-13 receptor subunit alpha-2                          | N/A       | 16.67    | 1             | 1                  | 1             | 2                 | 8.823E7              | 114                          | 12.4                     | 5.40                  |

|         |                                                                  |         |       |   |   |   |     |         |      |       |      |
|---------|------------------------------------------------------------------|---------|-------|---|---|---|-----|---------|------|-------|------|
| Q5XNR9  | Leukemia inhibitory factor receptor                              | IL13RA2 | 1.81  | 1 | 1 | 1 | 2   | 1.573E8 | 386  | 45.1  | 5.14 |
| P35521  | Methylosome subunit pICln                                        | LIFR    | 3.10  | 1 | 2 | 2 | 106 | 13.41E9 | 1097 | 123.6 | 5.64 |
| P23294  | Myelin proteolipid protein                                       | CLNS1A  | 11.06 | 1 | 1 | 1 | 1   | 5.176E8 | 235  | 25.9  | 4.16 |
| P49824  | Myosin-7                                                         | PLP1    | 3.97  | 1 | 1 | 1 | 1   |         | 277  | 30.1  | 8.35 |
| Q9TU19  | Nephrocystin-1 (Fragment)                                        | MYH7    | 0.88  | 1 | 1 | 1 | 1   |         | 1935 | 222.8 | 5.73 |
| O02813  | Neuropeptide Y receptor type 1                                   | NPHP1   | 3.72  | 1 | 3 | 3 | 15  | 1.075E9 | 565  | 63.9  | 4.96 |
| Q0ZAAQ8 | Peroxisome proliferator-activated receptor delta                 | NPY1R   | 4.19  | 1 | 1 | 1 | 1   | 7.980E8 | 382  | 44.2  | 7.77 |
| P80009  | Plasminogen (Fragment)                                           | PPARD   | 1.59  | 1 | 1 | 1 | 1   |         | 441  | 49.7  | 8.05 |
| Q6Q308  | Pleckstrin                                                       | PLG     | 3.00  | 1 | 1 | 1 | 1   | 1.628E8 | 333  | 36.7  | 8.10 |
| Q9GLW0  | Progesterone receptor                                            | PLEK    | 2.85  | 1 | 1 | 1 | 1   | 4.079E8 | 351  | 40.2  | 8.28 |
| Q5XXR2  | Pro-MCH                                                          | PGR     | 1.38  | 1 | 1 | 1 | 1   | 6.102E8 | 939  | 98.4  | 8.37 |
| Q5PU49  | Protein kinase C delta type                                      | PMCH    | 12.73 | 1 | 1 | 1 | 1   | 1.393E7 | 165  | 18.6  | 7.96 |
| Q29536  | Pyruvate kinase PKLR                                             | PRKCD   | 2.23  | 1 | 1 | 1 | 24  | 9.492E9 | 674  | 77.3  | 7.84 |
| P24409  | Ras-related protein Rab-10                                       | PKLR    | 1.92  | 1 | 1 | 1 | 1   | 4.766E7 | 574  | 62.0  | 7.75 |
| P61105  | Ras-related protein Rab-2A                                       | RAB10   | 11.00 | 6 | 2 | 2 | 2   | 1.420E7 | 200  | 22.6  | 8.38 |
| P06871  | Serine protease 1                                                | RAB2A   | 6.60  | 1 | 1 | 1 | 1   | 1.339E7 | 212  | 23.5  | 6.54 |
| P49822  | Serum albumin                                                    | PRSS1   | 4.07  | 1 | 1 | 1 | 1   | 1.771E8 | 246  | 26.2  | 8.07 |
| P54832  | Serum paraoxonase/arylesterase 2                                 | PON2    | 5.08  | 1 | 1 | 1 | 18  | 4.680E9 | 354  | 39.6  | 6.09 |
| P61010  | Signal recognition particle 54 kDa protein                       | SRP54   | 3.57  | 1 | 1 | 1 | 6   | 7.457E9 | 504  | 55.7  | 8.75 |
| P50997  | Sodium/potassium-transporting ATPase subunit alpha-1             | ATP1A1  | 1.47  | 2 | 1 | 1 | 1   |         | 1021 | 112.6 | 5.86 |
| Q5WR10  | Spliceosome RNA helicase DDX39B                                  | DDX39B  | 4.91  | 1 | 1 | 1 | 94  | 2.117E9 | 428  | 49.0  | 5.67 |
| O62683  | Tight junction protein ZO-3                                      | TJP3    | 1.56  | 1 | 1 | 1 | 1   | 3.456E9 | 898  | 98.4  | 7.31 |
| Q697L1  | Transient receptor potential cation channel subfamily V member 1 | TRPV1   | 1.90  | 1 | 1 | 1 | 6   | 3.018E9 | 840  | 95.2  | 7.30 |
| E2RDV1  | Tudor domain-containing protein 7                                | TDRD7   | 1.07  | 1 | 1 | 1 | 1   | 4.359E8 | 1125 | 126.6 | 7.64 |
| P63050  | Ubiquitin-60S ribosomal protein L40                              | UBA52   | 38.28 | 1 | 5 | 5 | 6   | 1.107E8 | 128  | 14.7  | 9.83 |
| Q5TJF0  | Vacuolar protein sorting-associated protein 52 homolog           | VPS52   | 1.11  | 1 | 1 | 1 | 247 | 1.934E8 | 723  | 82.2  | 5.99 |
| Q9XSR1  | Zinc finger protein                                              | ZNF252  | 2.29  | 1 | 1 | 1 | 3   | 11.66E9 | 873  | 99.4  | 8.65 |

1: Peptide spectrum matches

2: Amino acids

3: Molecular weight

4: calculated isoelectric point

5: *En* is equivalent to 10<sup>n</sup>.

**Table S3.** Proteins (*n* = 42) identified in sperm-rich fraction of semen from male dogs (protein identification by LC-MS/MS) (in alphabetical order).

| Accession No. | Description name of fully characterized proteins              | Gene Name | Coverage | Pro-teins | Unique Peptides | Pep-tides | PSMs <sup>1</sup> | Area                 | AAs <sup>2</sup> | MW <sup>3</sup> [kDa] | calc. pI <sup>4</sup> |
|---------------|---------------------------------------------------------------|-----------|----------|-----------|-----------------|-----------|-------------------|----------------------|------------------|-----------------------|-----------------------|
| E2RKA8        | 60S ribosomal protein L32                                     | RPL32     | 5.19     | 1         | 1               | 1         | 48                | 7.532E8 <sup>5</sup> | 135              | 15.8                  | 11.33                 |
| P62286        | Abnormal spindle-like microcephaly-associated protein homolog | ASPM      | 0.23     | 1         | 1               | 1         | 1                 | 9.734E6              | 3469             | 407.3                 | 10.61                 |
| Q6W3F4        | Adenosine receptor A2b                                        | ADORA2B   | 8.43     | 1         | 1               | 1         | 7                 | 3.624E8              | 332              | 36.4                  | 8.29                  |
| Q28343        | Aggrecan core protein                                         | ACAN      | 0.69     | 1         | 1               | 1         | 24                | 2.202E7              | 2333             | 240.4                 | 4.26                  |
| Q5F2N4        | Alpha-(1,3)-fucosyltransferase 10                             | FUT10     | 2.09     | 1         | 1               | 1         | 1                 | 4.179E6              | 478              | 56.0                  | 8.37                  |
| P58027        | Amine oxidase [flavin-containing] A                           | MAOA      | 3.61     | 1         | 1               | 1         | 3                 | 7.734E7              | 527              | 60.0                  | 8.02                  |
| P18649        | Apolipoprotein E                                              | APOE      | 3.10     | 1         | 1               | 1         | 1                 | 1.123E7              | 323              | 37.2                  | 5.30                  |
| P61797        | Aprataxin                                                     | APTX      | 5.26     | 1         | 1               | 1         | 67                | 3.106E8              | 342              | 39.0                  | 8.82                  |
| Q45T69        | Bcl-2-like protein 2                                          | BCL2L2    | 10.36    | 1         | 1               | 1         | 3                 | 8.300E7              | 193              | 20.8                  | 5.58                  |
| Q5TJG6        | Bromodomain-containing protein 2                              | BRD2      | 4.36     | 1         | 1               | 1         | 1                 |                      | 803              | 88.2                  | 9.06                  |
| F1PAA9        | Cadherin-1                                                    | CDH1      | 1.92     | 1         | 1               | 1         | 8                 | 3.801E5              | 885              | 97.7                  | 4.81                  |
| Q5ECR9        | C-C chemokine receptor type 5                                 | CCR5      | 1.70     | 1         | 1               | 1         | 1                 | 3.874E6              | 352              | 40.4                  | 9.32                  |
| O18806        | Coagulation factor VIII                                       | F8        | 2.22     | 1         | 2               | 2         | 2                 |                      | 2343             | 265.7                 | 6.77                  |
| Q5U820        | Cystic fibrosis transmembrane conductance regulator           | CFTR      | 1.15     | 1         | 1               | 1         | 2                 | 1.231E8              | 1483             | 168.4                 | 8.90                  |
| Q2KNA0        | Cytospin-A                                                    | SPECC1L   | 0.72     | 1         | 1               | 1         | 3                 | 1.656E7              | 1117             | 124.6                 | 5.76                  |
| Q767J3        | Deoxyribonuclease-1                                           | DNASE1    | 10.21    | 1         | 1               | 1         | 2                 | 6.938E7              | 284              | 31.5                  | 5.45                  |
| P13206        | Endothelin-1                                                  | EDN1      | 4.95     | 1         | 1               | 1         | 1                 | 1.954E7              | 202              | 23.0                  | 9.54                  |
| Q64HP0        | G1/S-specific cyclin-D1                                       | CCND1     | 4.75     | 1         | 1               | 1         | 1                 |                      | 295              | 33.3                  | 5.44                  |
| P30552        | Gastrin/cholecystokinin type B receptor                       | CCKBR     | 6.84     | 1         | 1               | 1         | 1                 | 6.379E5              | 453              | 48.5                  | 9.85                  |
| Q4PRC2        | Glutamate decarboxylase 2                                     | GAD2      | 2.05     | 1         | 1               | 1         | 1                 | 1.015E8              | 585              | 65.4                  | 6.79                  |
| P17124        | Histamine H2 receptor                                         | HRH2      | 11.42    | 1         | 1               | 1         | 1                 | 1.507E7              | 359              | 40.2                  | 9.09                  |
| Q29467        | Inositol polyphosphate-5-phosphatase A                        | INPP5A    | 2.18     | 1         | 1               | 1         | 2                 | 7.024E7              | 412              | 47.7                  | 7.36                  |
| Q28268        | Interleukin-12 subunit beta                                   | IL12B     | 2.13     | 1         | 1               | 1         | 1                 |                      | 329              | 37.4                  | 7.17                  |
| Q6EII9        | Keratin, type II cytoskeletal 1                               | KRT1      | 3.55     | 1         | 1               | 1         | 1                 | 1.312E8              | 619              | 63.8                  | 7.84                  |
| Q1ZZS1        | Lengsin                                                       | LGSN      | 4.88     | 1         | 1               | 1         | 12                |                      | 574              | 63.9                  | 6.09                  |
| Q30DN6        | Lysine-specific demethylase 5D                                | KDM5D     | 1.75     | 1         | 1               | 1         | 1                 | 8.653E6              | 1545             | 175.5                 | 5.74                  |
| Q9TU19        | Nephrocystin-1 (Fragment)                                     | NPHP1     | 6.37     | 1         | 1               | 1         | 1                 | 4.159E7              | 565              | 63.9                  | 4.96                  |
| O62699        | Nitric oxide synthase, inducible                              | NOS2      | 0.69     | 1         | 1               | 1         | 1                 | 8.335E6              | 1154             | 131.8                 | 8.10                  |
| F1P7W1        | Olfactory receptor                                            | OR13C11B  | 10.97    | 1         | 1               | 1         | 1                 |                      | 319              | 35.4                  | 8.65                  |
| Q6Q7P4        | Protein 4.1                                                   | EPB41     | 3.95     | 1         | 1               | 1         | 325               | 3.624E8              | 810              | 90.6                  | 5.55                  |
| E2QY99        | Protein PALS1                                                 | PALS1     | 1.33     | 1         | 1               | 1         | 3                 | 6.161E7              | 675              | 77.2                  | 6.18                  |
| Q5XM32        | Relaxin receptor 2                                            | RXFP2     | 4.88     | 1         | 2               | 2         | 5                 | 3.861E7              | 737              | 84.1                  | 8.38                  |
| Q75W64        | Single-stranded DNA cytosine deaminase                        | AICDA     | 7.58     | 1         | 1               | 1         | 1                 |                      | 198              | 23.9                  | 9.35                  |

| P23685        | Sodium/calcium exchanger 1                                             | SLC8A1    | 2.89     | 1         | 1               | 1         | 18   | 7.085E7 | 970  | 107.9    | 4.96     |
|---------------|------------------------------------------------------------------------|-----------|----------|-----------|-----------------|-----------|------|---------|------|----------|----------|
| Q9TTW3        | Tektin-1                                                               | TEKT1     | 2.82     | 1         | 1               | 1         | 3    | 2.136E7 | 426  | 49.0     | 6.16     |
| A8C750        | Thyroid adenoma-associated protein homolog                             | THADA     | 1.49     | 1         | 1               | 1         | 40   | 3.624E8 | 1948 | 218.8    | 6.46     |
| Q8HYB7        | Thyroid peroxidase                                                     | TPO       | 3.60     | 1         | 1               | 1         | 1    |         | 944  | 101.3    | 7.81     |
| Q5I2M8        | Toll-like receptor 9                                                   | TLR9      | 3.78     | 1         | 1               | 1         | 1    |         | 1032 | 115.2    | 9.03     |
| Accession No. | Description name of proteins not fully characterized                   | Gene Name | Coverage | Pro-teins | Unique Peptides | Pep-tides | PSMs | Area    | AAs  | MW [kDa] | calc. pI |
| F1PA44        | Coiled-coil domain containing protein 112 (Submitted name)             | CCDC112   | 2.12     | 1         | 1               | 1         | 1    |         | 425  | 50.8     | 9.72     |
| F1P660        | Mediator complex subunit 23 (Submitted name)                           | MED23     | 3.14     | 1         | 1               | 1         | 1    |         | 1371 | 156.7    | 7.31     |
| F1PH13        | Potassium channel tetramerization domain containing 8 (Submitted name) | KCTD8     | 1.89     | 1         | 1               | 1         | 1    |         | 475  | 51.9     | 8.51     |
| F1PAB2        | Transport and Golgi organization 6 homolog (Submitted name)            | TANGO6    | 1.10     | 1         | 1               | 1         | 1    |         | 1091 | 120.7    | 6.14     |

1: Peptide spectrum matches

2: Amino acids

3: Molecular weight

4: calculated isoelectric point

5:  $E_n$  is equivalent to  $10^n$ .

**Table S4.** Proteins (*n* = 43) identified in prostatic fraction of semen from male dogs (protein identification by LC-MS/MS) (in alphabetical order).

| Accession No. | Description name                                                            | Gene Name | Coverage | Pro-<br>teins | Unique<br>Peptide<br>s | Pep-<br>tides | PSMs<br>1 | Area                     | AAs <sup>2</sup> | MW <sup>3</sup><br>[kDa] | calc. pI <sup>4</sup> |
|---------------|-----------------------------------------------------------------------------|-----------|----------|---------------|------------------------|---------------|-----------|--------------------------|------------------|--------------------------|-----------------------|
| Q6XXX9        | 5-hydroxytryptamine receptor 1A                                             | HTR1A     | 7.09     | 1             | 1                      | 1             | 1         | 3.207E<br>8 <sup>5</sup> | 423              | 46.3                     | 9.14                  |
| Q5TJE9        | 40S ribosomal protein S18                                                   | RPS18     | 7.89     | 1             | 1                      | 1             | 2         | 8.889E<br>6              | 152              | 17.7                     | 10.99                 |
| D0VWQ5        | 60S ribosomal protein L19                                                   | RPL19     | 4.59     | 1             | 1                      | 1             | 1         | 1.948E<br>7              | 196              | 23.5                     | 11.47                 |
| O18840        | Actin, cytoplasmic 1                                                        | ACTB      | 17.33    | 1             | 4                      | 4             | 5         | 1.408E<br>8              | 375              | 41.7                     | 5.48                  |
| P79143        | Aminopeptidase N                                                            | ANPEP     | 1.44     | 1             | 1                      | 1             | 1         |                          | 975              | 110.2                    | 6.18                  |
| Q7YRF1        | AP-3 complex subunit beta-1                                                 | AP3B1     | 1.65     | 1             | 1                      | 1             | 1         | 9.415E<br>6              | 1091             | 121.1                    | 5.76                  |
| E2RE76        | Apolipoprotein A-IV                                                         | APOA4     | 3.44     | 1             | 1                      | 1             | 1         |                          | 378              | 42.5                     | 6.09                  |
| P18649        | Apolipoprotein E                                                            | APOE      | 5.57     | 1             | 1                      | 1             | 1         | 9.748E<br>7              | 305              | 35.3                     | 5.24                  |
| P09582        | Arginine esterase                                                           | N/A       | 28.08    | 1             | 15                     | 15            | 301       | 107.1E<br>9              | 260              | 28.7                     | 7.78                  |
| P25473        | Clusterin                                                                   | CLU       | 3.82     | 1             | 1                      | 1             | 1         | 1.718E<br>7              | 445              | 51.8                     | 5.91                  |
| E2R1I5        | Coiled-coil domain-containing protein 39                                    | CCDC39    | 1.06     | 1             | 1                      | 1             | 3         | 1.047E<br>9              | 939              | 110.3                    | 6.61                  |
| P49819        | Dihydrolipoyl dehydrogenase, mitochondrial                                  | DLD       | 2.55     | 1             | 1                      | 1             | 1         | 5.787E<br>6              | 509              | 54.1                     | 7.84                  |
| Q8WN22        | DNA-dependent protein kinase catalytic subunit                              | PRKDC     | 0.60     | 1             | 1                      | 1             | 1         |                          | 4144             | 472.8                    | 7.23                  |
| E2RQ08        | Dolichyl-diphosphooligosaccharide--protein glycosyltransferase<br>subunit 1 | RPN1      | 2.97     | 1             | 1                      | 1             | 1         | 1.227E<br>8              | 607              | 68.5                     | 6.42                  |
| Q4VSN4        | Dual serine/threonine and tyrosine protein kinase                           | DSTYK     | 1.83     | 1             | 1                      | 1             | 1         |                          | 931              | 104.9                    | 6.71                  |
| Q659K0        | G2/mitotic-specific cyclin-B3                                               | CCNB3     | 1.43     | 1             | 1                      | 1             | 1         |                          | 1330             | 152.0                    | 8.94                  |
| Q28259        | Glyceraldehyde-3-phosphate dehydrogenase                                    | GAPDH     | 4.50     | 1             | 1                      | 1             | 1         | 1.826E<br>8              | 333              | 35.8                     | 8.12                  |
| P62872        | Guanine nucleotide-binding protein G(I)/G(S)/G(T) subunit beta-1            | GNB1      | 8.24     | 1             | 1                      | 1             | 1         | 1.387E<br>8              | 340              | 37.4                     | 6.00                  |
| Q7YQC6        | Heat shock 70 kDa protein 1                                                 | HSPA1     | 1.72     | 1             | 1                      | 1             | 1         | 1.401E<br>8              | 641              | 70.0                     | 5.66                  |

|        |                                                                |        |       |   |   |   |   |             |      |       |      |
|--------|----------------------------------------------------------------|--------|-------|---|---|---|---|-------------|------|-------|------|
| Q28270 | Hematopoietic progenitor cell antigen                          | CD34   | 3.86  | 1 | 1 | 1 | 1 | 4.782E<br>7 | 389  | 41.3  | 5.88 |
| P39881 | Homeobox protein cut-like 1 (Fragment)                         | CUX1   | 1.85  | 1 | 1 | 1 | 1 | 7.528E<br>7 | 975  | 105.4 | 9.89 |
| Q00M95 | Inactive rhomboid protein 2                                    | RHBDF2 | 2.18  | 1 | 1 | 1 | 1 | 3.314E<br>9 | 827  | 93.5  | 8.76 |
| Q6EIY9 | Keratin, type II cytoskeletal 1                                | KRT1   | 3.55  | 1 | 1 | 1 | 1 | 1.312E<br>8 | 619  | 63.8  | 7.84 |
| Q076A6 | Myosin-1                                                       | MYH1   | 1.65  | 2 | 2 | 2 | 2 |             | 1939 | 223.0 | 5.76 |
| Q258K2 | Myosin-9                                                       | MYH9   | 0.77  | 1 | 1 | 1 | 1 |             | 1960 | 226.3 | 5.60 |
| O62699 | Nitric oxide synthase, inducible                               | NOS2   | 3.38  | 1 | 1 | 1 | 1 | 6.234E<br>7 | 1154 | 131.8 | 8.10 |
| Q50KA9 | Nucleoside diphosphate kinase A                                | NME1   | 20.39 | 1 | 2 | 2 | 2 | 3.082E<br>7 | 152  | 17.2  | 6.01 |
| Q95156 | Olfactory receptor-like protein OLF3                           | N/A    | 12.93 | 1 | 1 | 1 | 1 |             | 317  | 35.2  | 8.22 |
| Q8MJ04 | Oxygen-regulated protein 1                                     | RP1    | 1.12  | 1 | 1 | 1 | 1 |             | 2141 | 239.9 | 6.65 |
| Q28256 | Platelet glycoprotein Ib alpha chain                           | GP1BA  | 1.03  | 1 | 1 | 1 | 1 | 2.770E<br>8 | 677  | 74.1  | 5.91 |
| Q9GL24 | Procathepsin L                                                 | CTSL   | 7.21  | 1 | 2 | 2 | 2 | 6.320E<br>7 | 333  | 37.4  | 7.09 |
| Q9XSR3 | RNA-binding protein 47                                         | RBM47  | 1.86  | 1 | 1 | 1 | 1 | 1.598E<br>7 | 592  | 63.5  | 8.05 |
| Q28263 | Rod cGMP-specific 3',5'-cyclic phosphodiesterase subunit alpha | PDE6A  | 2.32  | 1 | 1 | 1 | 1 | 1.026E<br>8 | 861  | 99.6  | 5.63 |
| O46674 | Sarcoplasmic/endoplasmic reticulum calcium ATPase 2            | ATP2A2 | 1.20  | 1 | 1 | 1 | 1 | 1.100E<br>7 | 997  | 109.6 | 5.36 |
| P54832 | Serum paraoxonase/arylesterase 2                               | PON2   | 5.08  | 1 | 1 | 1 | 1 | 8.273E<br>6 | 354  | 39.6  | 6.09 |
| Q6Y4Q5 | Stromelysin-1                                                  | MMP3   | 3.77  | 1 | 1 | 1 | 1 | 3.853E<br>7 | 478  | 53.6  | 5.48 |
| A0M8U6 | Testin                                                         |        | 7.36  | 1 | 1 | 1 | 1 | 4.126E<br>6 | 421  | 48.0  | 7.78 |
| O62683 | Tight junction protein ZO-3                                    | TJP3   | 5.46  | 1 | 1 | 1 | 1 |             | 898  | 98.4  | 7.31 |
| P54714 | Triosephosphate isomerase                                      | TPI1   | 24.10 | 1 | 3 | 3 | 3 | 7.346E<br>7 | 249  | 26.7  | 7.33 |
| P63050 | Ubiquitin-60S ribosomal protein L40                            | UBA52  | 36.72 | 1 | 4 | 4 | 4 | 1.013E<br>8 | 128  | 14.7  | 9.83 |
| Q9N1T2 | X-linked retinitis pigmentosa GTPase regulator                 | RPGR   | 1.00  | 1 | 1 | 1 | 1 |             | 1003 | 111.0 | 4.93 |

|        |                          |         |      |   |   |   |   |             |     |      |      |
|--------|--------------------------|---------|------|---|---|---|---|-------------|-----|------|------|
| Q5QQ50 | Xylosyltransferase 2     | XYLT2   | 2.43 | 1 | 1 | 1 | 1 | 7.679E<br>8 | 865 | 96.7 | 8.40 |
| Q5TJF6 | Zinc transporter SLC39A7 | SLC39A7 | 4.26 | 1 | 1 | 1 | 1 |             | 469 | 49.9 | 6.95 |

1: Peptide spectrum matches

2: Amino acids

3: Molecular weight

4: calculated isoelectric point

5:  $E_n$  is equivalent to  $10^n$ .



**Table S5.** Proteins identified exclusively in semen sperm-rich fraction or in semen prostatic fraction from male dogs (protein identification by LC-MS/MS).

| Accession No.                                                           | Description name                                                         |
|-------------------------------------------------------------------------|--------------------------------------------------------------------------|
| Proteins identified exclusively in sperm-rich fraction ( <i>n</i> = 37) |                                                                          |
| E2RKA8                                                                  | 60S ribosomal protein L32                                                |
| Q6W3F4                                                                  | Adenosine receptor A2b                                                   |
| Q28343                                                                  | Aggrecan core protein                                                    |
| Q5F2N4                                                                  | Alpha-(1,3)-fucosyltransferase 10                                        |
| P58027                                                                  | Amine oxidase [flavin-containing] A                                      |
| P61797                                                                  | Aprataxin                                                                |
| Q45T69                                                                  | Bcl-2-like protein 2                                                     |
| Q5TJG6                                                                  | Bromodomain-containing protein 2                                         |
| F1PAA9                                                                  | Cadherin-1                                                               |
| Q5ECR9                                                                  | C-C chemokine receptor type 5                                            |
| O18806                                                                  | Coagulation factor VIII                                                  |
| F1PA44                                                                  | Coiled-coil domain containing protein 112 (Submitted name)               |
| Q5U820                                                                  | Cystic fibrosis transmembrane conductance regulator                      |
| Q2KNA0                                                                  | Cytospin-A                                                               |
| Q767J3                                                                  | Deoxyribonuclease-1                                                      |
| P13206                                                                  | Endothelin-1                                                             |
| Q64HP0                                                                  | G1/S-specific cyclin-D1                                                  |
| P30552                                                                  | Gastrin/cholecystokinin type B receptor                                  |
| Q4PRC2                                                                  | Glutamate decarboxylase 2                                                |
| P17124                                                                  | Histamine H2 receptor                                                    |
| Q29467                                                                  | Inositol polyphosphate-5-phosphatase A                                   |
| Q28268                                                                  | Interleukin-12 subunit beta                                              |
| Q1ZZS1                                                                  | Lengsin                                                                  |
| Q30DN6                                                                  | Lysine-specific demethylase 5D                                           |
| F1P660                                                                  | Mediator complex subunit 23 (Submitted name)                             |
| F1P7W1                                                                  | Olfactory receptor                                                       |
| F1PH13                                                                  | Potassium channel tetramerization domain containing 8 (Submitted name)   |
| Q6Q7P4                                                                  | Protein 4.1                                                              |
| E2QY99                                                                  | Protein PALS1                                                            |
| Q5XM32                                                                  | Relaxin receptor 2                                                       |
| Q75W64                                                                  | Single-stranded DNA cytosine deaminase                                   |
| P23685                                                                  | Sodium/calcium exchanger 1                                               |
| Q9TTW3                                                                  | Tektin-1                                                                 |
| A8C750                                                                  | Thyroid adenoma-associated protein homolog                               |
| Q8HYB7                                                                  | Thyroid peroxidase                                                       |
| Q5I2M8                                                                  | Toll-like receptor 9                                                     |
| F1PAB2                                                                  | Transport and Golgi organization 6 homolog (Submitted name)              |
| Proteins identified exclusively in prostatic fraction ( <i>n</i> = 29)  |                                                                          |
| Q6XXX9                                                                  | 5-hydroxytryptamine receptor 1A                                          |
| Q5TJE9                                                                  | 40S ribosomal protein S18                                                |
| D0VWQ5                                                                  | 60S ribosomal protein L19                                                |
| P79143                                                                  | Aminopeptidase N                                                         |
| Q7YRF1                                                                  | AP-3 complex subunit beta-1                                              |
| E2RE76                                                                  | Apolipoprotein A-IV                                                      |
| P49819                                                                  | Dihydrolipoyl dehydrogenase, mitochondrial                               |
| E2RQ08                                                                  | Dolichyl-diphosphooligosaccharide--protein glycosyltransferase subunit 1 |
| Q4VSN4                                                                  | Dual serine/threonine and tyrosine protein kinase                        |

---

|        |                                                                  |
|--------|------------------------------------------------------------------|
| P62872 | Guanine nucleotide-binding protein G(I)/G(S)/G(T) subunit beta-1 |
| Q28270 | Hematopoietic progenitor cell antigen                            |
| P39881 | Homeobox protein cut-like 1 (Fragment)                           |
| Q00M95 | Inactive rhomboid protein 2                                      |
| Q076A6 | Myosin-1                                                         |
| Q258K2 | Myosin-9                                                         |
| Q50KA9 | Nucleoside diphosphate kinase A                                  |
| Q95156 | Olfactory receptor-like protein OLF3                             |
| Q8MJ04 | Oxygen-regulated protein 1                                       |
| Q28256 | Platelet glycoprotein Ib alpha chain                             |
| Q9GL24 | Procathepsin L                                                   |
| Q9XSR3 | RNA-binding protein 47                                           |
| Q28263 | Rod cGMP-specific 3',5'-cyclic phosphodiesterase subunit alpha   |
| O46674 | Sarcoplasmic/endoplasmic reticulum calcium ATPase 2              |
| Q6Y4Q5 | Stromelysin-1                                                    |
| A0M8U6 | Testin                                                           |
| P54714 | Triosephosphate isomerase                                        |
| Q9N1T2 | X-linked retinitis pigmentosa GTPase regulator                   |
| Q5QQ50 | Xylosyltransferase 2                                             |
| Q5TJF6 | Zinc transporter SLC39A7                                         |

---

**Table S6.** Biological processes in which proteins detected in blood plasma, semen prostatic fraction and semen sperm-rich fraction from male dogs, were involved (protein identification by LC-MS/MS).

| Biological processes              | Proteins identified in  |                                 |                                |
|-----------------------------------|-------------------------|---------------------------------|--------------------------------|
|                                   | blood plasma<br>(n =59) | sperm-rich fraction<br>(n = 42) | prostatic fraction<br>(n = 43) |
| Blood coagulation and haemostasis | 1                       | 1                               | 1                              |
| Cell communication                | 4                       | 5                               | 6                              |
| Cell cycle                        | 11                      | 9                               | 5                              |
| Cell death - Apoptosis            | 2                       | 2                               | 1                              |
| Cell organization and biogenesis  | 8                       | 7                               | 9                              |
| Glycolytic process                | 1                       | 1                               | 2                              |
| Inflammatory and defence response | 5                       | 4                               | 3                              |
| Metabolic processes               | 10                      | 5                               | 5                              |
| Stress response                   | 1                       | 0                               | 1                              |
| Transport of ions and molecules   | 12                      | 3                               | 6                              |
| Other                             | 3                       | 3                               | 2                              |
| No annotation available           | 1                       | 2                               | 2                              |

**Table S7.** Subcellular location of proteins detected in blood plasma, semen prostatic fraction and semen sperm-rich fraction from male dogs (protein identification by LC-MS/MS).

| Subcellular location    | Proteins identified in  |                                 |                                |
|-------------------------|-------------------------|---------------------------------|--------------------------------|
|                         | blood plasma<br>(n =59) | sperm-rich fraction<br>(n = 42) | prostatic fraction<br>(n = 43) |
| Cell membrane           | 14                      | 15                              | 15                             |
| Cytoplasm               | 23                      | 8                               | 16                             |
| Mitochondria            | 1                       | 2                               | 1                              |
| Nucleus                 | 10                      | 7                               | 7                              |
| Secreted                | 10                      | 6                               | 4                              |
| No annotation available | 1                       | 4                               | 0                              |

**Table S8.** Molecular function of proteins detected in blood plasma, semen prostatic fraction and semen sperm-rich fraction from male dogs (protein identification by LC-MS/MS).

| Molecular function            | Proteins identified in  |                                 |                                |
|-------------------------------|-------------------------|---------------------------------|--------------------------------|
|                               | blood plasma<br>(n =59) | sperm-rich fraction<br>(n = 42) | prostatic fraction<br>(n = 43) |
| Binding                       | 22                      | 11                              | 17                             |
| Enzyme regulatory activity    | 18                      | 11                              | 15                             |
| Receptors                     | 5                       | 7                               | 2                              |
| Structural molecular activity | 4                       | 1                               | 2                              |
| Other                         | 6                       | 4                               | 4                              |
| No annotation available       | 4                       | 8                               | 3                              |

**Table S9.** Details of the biological process, the subcellular location and the molecular function of all proteins( $n = 128$ ) identified in the study (protein identification by LC-MS/MS) (in alphabetical order).

| Accession No | Accession Name | Description Name                                              | Tissue in which Identified <sup>1</sup> | Biological Process in which Involved | Subcellular Location | Molecular Function            |
|--------------|----------------|---------------------------------------------------------------|-----------------------------------------|--------------------------------------|----------------------|-------------------------------|
| Q5TJF5       | DHB8_CANLF     | (3R)-3-hydroxyacyl-CoA dehydrogenase                          | BP                                      | Metabolic process                    | Mitochondria         | Enzyme regulatory activity    |
| Q5TJE9       | RS18_CANLF     | 40S ribosomal protein S18                                     | PF                                      | Cell cycle                           | Cytoplasm            | Binding                       |
| Q6XXX9       | 5HT1A_CANLF    | 5-hydroxytryptamine receptor 1A                               | PF                                      | Cell communication                   | Cell membrane        | Receptors                     |
| E2QXF3       | RL15_CANFA     | 60S ribosomal protein L15                                     | BP                                      | Cell cycle                           | Cell membrane        | Structural molecular activity |
| D0VWQ5       | RL19_CANLF     | 60S ribosomal protein L19                                     | PF                                      | Cell cycle                           | Nucleus              | Structural molecular activity |
| E2RKA8       | RL32_CANLF     | 60S ribosomal protein L32                                     | SRF                                     | Cell cycle                           | Cytoplasm            | Structural molecular activity |
| P62286       | ASPM_CANLF     | Abnormal spindle-like microcephaly-associated protein homolog | BP, SRF                                 | Cell cycle                           | Nucleus              | Binding                       |
| Q8HY67       | AN32A_CANLF    | Acidic leucine-rich nuclear phosphoprotein 32 family member A | BP                                      | Cell cycle                           | Nucleus              | Binding                       |
| O18840       | ACTB_CANLF     | Actin, cytoplasmic 1                                          | BP, PF                                  | Cell organization and biogenesis     | Cytoplasm            | Binding                       |
| Q6W3F4       | AA2BR_CANLF    | Adenosine receptor A2b                                        | SRF                                     | no annotation available              | Cell membrane        | Receptors                     |
| Q28343       | PGCA_CANLF     | Aggrecan core protein                                         | SRF                                     | Cell organization and biogenesis     | Secreted             | Binding                       |
| Q5F2N4       | FUT10_CANLF    | Alpha-(1,3)-fucosyltransferase 10                             | SRF                                     | Glycolytic process                   | Cytoplasm            | Enzyme regulatory activity    |
| P58027       | AOFA_CANLF     | Amine oxidase [flavin-containing] A                           | SRF                                     | Metabolic process                    | Mitochondria         | Enzyme regulatory activity    |
| P79143       | AMPN_CANLF     | Aminopeptidase N                                              | PF                                      | Cell organization and biogenesis     | Cell membrane        | Enzyme regulatory activity    |
| Q29471       | ANX13_CANLF    | Annexin A13                                                   | BP                                      | Transport of ions and molecules      | Cell membrane        | Binding                       |
| Q7YRF1       | AP3B1_CANLF    | AP-3 complex subunit beta-1                                   | PF                                      | Transport of ions and molecules      | Cytoplasm            | no annotation available       |
| P02648       | APOA1_CANLF    | Apolipoprotein A-I                                            | BP                                      | Metabolic process                    | Secreted             | Binding                       |

|        |              |                                                            |         |                                   |                         |                            |
|--------|--------------|------------------------------------------------------------|---------|-----------------------------------|-------------------------|----------------------------|
| E2RE76 | APOA4_CANLF  | Apolipoprotein A-IV                                        | PF      | Transport of ions and molecules   | Secreted                | Binding                    |
| P18649 | APOE_CANLF   | Apolipoprotein E                                           | PF, SRF | Transport of ions and molecules   | Secreted                | Binding                    |
| P61797 | APTX_CANLF   | Aprataxin                                                  | SRF     | Cell cycle                        | Nucleus                 | Binding                    |
| P09582 | ESTA_CANFA   | Arginine esterase                                          | BP, PF  | Other                             | Cytoplasm               | Enzyme regulatory activity |
| Q32KH9 | ARSG_CANLF   | Arylsulfatase G                                            | BP      | Metabolic process                 | Cytoplasm               | Enzyme regulatory activity |
| A1E2V0 | BIRC3_CANLF  | Baculoviral IAP repeat-containing protein 3                | BP      | Inflammatory and defence response | Cytoplasm               | Enzyme regulatory activity |
| Q45T69 | B2CL2_CANLF  | Bcl-2-like protein 2                                       | SRF     | Cell death - Apoptosis            | Mitochondria            | Binding                    |
| Q5TJE8 | B3GT4_CANLF  | Beta-1,3-galactosyltransferase 4                           | BP      | Metabolic process                 | Cytoplasm               | Enzyme regulatory activity |
| Q95153 | BRCA1_CANLF  | Breast cancer type 1 susceptibility protein homolog        | BP      | Cell cycle                        | Nucleus                 | Binding                    |
| Q5TJG6 | BRD2_CANLF   | Bromodomain-containing protein 2                           | SRF     | Cell cycle                        | Nucleus                 | Other                      |
| F1PAA9 | CADH1_CANLF  | Cadherin-1                                                 | SRF     | Cell communication                | Cell membrane           | Binding                    |
| E2RA18 | CLGN_CANLF   | Calmegin                                                   | BP      | Transport of ions and molecules   | Cytoplasm               | Other                      |
| P24643 | CALX_CANLF   | Calnexin                                                   | BP      | Cell organization and biogenesis  | Cytoplasm               | Other                      |
| Q9GL24 | CATL1_CANLF  | Cathepsin L1                                               | PF      | Inflammatory and defence response | Cell membrane           | Enzyme regulatory activity |
| Q5ECR9 | CCR5_CANLF   | C-C chemokine receptor type 5                              | SRF     | Inflammatory and defence response | Cell membrane           | Receptors                  |
| O77746 | PDE5A_CANLF  | cGMP-specific 3',5'-cyclic phosphodiesterase               | BP      | Metabolic process                 | Cytoplasm               | Enzyme regulatory activity |
| P25473 | CLUS_CANLF   | Clusterin                                                  | BP, PF  | Cell death - Apoptosis            | Cytoplasm               | Other                      |
| O18806 | FA8_CANLF    | Coagulation factor VIII                                    | SRF     | Blood coagulation and haemostasis | Secreted                | Enzyme regulatory activity |
| E2R1I5 | CCD39_CANFA  | Coiled-coil domain-containing protein 39                   | BP, PF  | Other                             | Cytoplasm               | no annotation available    |
| F1PA44 | F1PA44_CANFA | Coiled-coil domain containing protein 112 (Submitted name) | SRF     | no annotation available           | no annotation available | no annotation available    |

|        |             |                                                                          |        |                                   |                         |                               |
|--------|-------------|--------------------------------------------------------------------------|--------|-----------------------------------|-------------------------|-------------------------------|
| Q3LSL6 | CXCR4_CANLF | C-X-C chemokine receptor type 4                                          | BP     | Cell organization and biogenesis  | Cell membrane           | Receptors                     |
| Q5U820 | CFTR_CANLF  | Cystic fibrosis transmembrane conductance regulator                      | SRF    | Transport of ions and molecules   | Cell membrane           | Binding                       |
| Q2KNA0 | CYTSA_CANLF | Cytospin-A                                                               | SRF    | Cell cycle                        | Cytoplasm               | no annotation available       |
| Q767J3 | DNAS1_CANLF | Deoxyribonuclease-1                                                      | SRF    | Cell death - Apoptosis            | Secreted                | Enzyme regulatory activity    |
| P49819 | DLDH_CANLF  | Dihydrolipoyl dehydrogenase, mitochondrial                               | PF     | Metabolic process                 | Mitochondria            | Enzyme regulatory activity    |
| Q8WN22 | PRKDC_CANLF | DNA-dependent protein kinase catalytic subunit                           | BP, PF | Inflammatory and defence response | Nucleus                 | Enzyme regulatory activity    |
| E2RQ08 | RPN1_CANLF  | Dolichyl-diphosphooligosaccharide--protein glycosyltransferase subunit 1 | PF     | Glycolytic process                | Cell membrane           | no annotation available       |
| Q4VSN4 | DUSTY_CANLF | Dual serine/threonine and tyrosine protein kinase                        | PF     | Cell organization and biogenesis  | Cell membrane           | Enzyme regulatory activity    |
| P41148 | ENPL_CANLF  | Endoplasmin                                                              | BP     | Transport of ions and molecules   | Cytoplasm               | Other                         |
| P13206 | EDN1_CANLF  | Endothelin-1                                                             | SRF    | Cell organization and biogenesis  | Secreted                | Other                         |
| Q9GL25 | ESPB1_CANLF | Epididymal sperm-binding protein 1                                       | BP     | Cell organization and biogenesis  | Secreted                | Binding                       |
| P68213 | FIBA_CANLF  | Fibrinogen alpha chain                                                   | BP     | Inflammatory and defence response | Secreted                | no annotation available       |
| P02677 | FIBB_CANLF  | Fibrinogen beta chain (Fragment)                                         | BP     | Inflammatory and defence response | Secreted                | no annotation available       |
| Q64HP0 | CCND1_CANLF | G1/S-specific cyclin-D1                                                  | SRF    | Cell cycle                        | Nucleus                 | Other                         |
| Q659K0 | CCNB3_CANFA | G2/mitotic-specific cyclin-B3                                            | BP, PF | Cell cycle                        | Nucleus                 | Binding                       |
| A2IBY7 | CRYGS_CANLF | Gamma-crystallin S                                                       | BP     | Other                             | no annotation available | Structural molecular activity |
| P30552 | GASR_CANLF  | Gastrin/cholecystokinin type B receptor                                  | SRF    | Other                             | Cell membrane           | Receptors                     |
| A0PA85 | DCE1_CANFA  | Glutamate decarboxylase 1                                                | BP     | Metabolic process                 | Cell membrane           | Enzyme regulatory activity    |
| Q4PRC2 | DCE2_CANLF  | Glutamate decarboxylase 2                                                | SRF    | Metabolic process                 | Cell membrane           | Enzyme regulatory activity    |

|        |              |                                                                  |         |                                   |                         |                            |
|--------|--------------|------------------------------------------------------------------|---------|-----------------------------------|-------------------------|----------------------------|
| Q28259 | G3P_CANLF    | Glyceraldehyde-3-phosphate dehydrogenase                         | BP, PF  | Metabolic process                 | Nucleus                 | Enzyme regulatory activity |
| P62872 | GBB1_CANLF   | Guanine nucleotide-binding protein G(I)/G(S)/G(T) subunit beta-1 | PF      | Cell organization and biogenesis  | Cell membrane           | Binding                    |
| Q7YQC6 | HSP71_CANLF  | Heat shock 70 kDa protein 1                                      | BP, PF  | Stress response                   | Cytoplasm               | Other                      |
| Q28270 | CD34_CANFA   | Hematopoietic progenitor cell antigen                            | PF      | Cell communication                | Cell membrane           | Binding                    |
| P60529 | HBA_CANLF    | Hemoglobin subunit alpha                                         | BP      | Transport of ions and molecules   | Cytoplasm               | Binding                    |
| P60524 | HBB_CANLF    | Hemoglobin subunit beta                                          | BP      | Transport of ions and molecules   | Cytoplasm               | Binding                    |
| P17124 | HRH2_CANLF   | Histamine H2 receptor                                            | SRF     | Cell communication                | Cell membrane           | Receptors                  |
| P39881 | CUX1_CANFA   | Homeobox protein cut-like 1 (Fragment)                           | PF      | Cell cycle                        | Nucleus                 | Binding                    |
| P01784 | HV01_CANLF   | Ig heavy chain V region GOM                                      | BP      | Inflammatory and defence response | Secreted                | Binding                    |
| Q00M95 | RHDF2_CANFA  | Inactive rhomboid protein 2                                      | PF      | Transport of ions and molecules   | Cell membrane           | Binding                    |
| Q29467 | I5P1_CANLF   | Inositol polyphosphate-5-phosphatase A                           | SRF     | Cell communication                | Cell membrane           | Enzyme regulatory activity |
| Q28268 | IL12B_CANLF  | Interleukin-12 subunit beta                                      | SRF     | Inflammatory and defence response | Secreted                | Other                      |
| Q95LF0 | I13R2_CANLF  | Interleukin-13 receptor subunit alpha-2                          | BP      | Cell communication                | Cell membrane           | Receptors                  |
| Q6EIY9 | K2C1_CANLF   | Keratin, type II cytoskeletal 1                                  | PF, SRF | Cell organization and biogenesis  | Cell membrane           | Binding                    |
| Q1ZZS1 | LGSN_CANLF   | Lengsin                                                          | SRF     | Metabolic process                 | no annotation available | Enzyme regulatory activity |
| Q5XNR9 | LIFR_CANLF   | Leukemia inhibitory factor receptor                              | BP      | Cell communication                | Cell membrane           | Receptors                  |
| Q30DN6 | KDM5D_CANLF  | Lysine-specific demethylase 5D                                   | SRF     | Cell organization and biogenesis  | Nucleus                 | Enzyme regulatory activity |
| E2QY99 | PALS1_CANLF  | MAGUK p55 subfamily member 5                                     | SRF     | Cell organization and biogenesis  | Cell membrane           | Binding                    |
| F1P660 | F1P660_CANFA | Mediator complex subunit 23 (Submitted name)                     | SRF     | Cell cycle                        | Nucleus                 | no annotation available    |

|        |              |                                                                        |         |                                   |               |                               |
|--------|--------------|------------------------------------------------------------------------|---------|-----------------------------------|---------------|-------------------------------|
| P35521 | ICLN_CANLF   | Methylosome subunit pICln                                              | BP      | Cell cycle                        | Nucleus       | Binding                       |
| P23294 | MYPR_CANLF   | Myelin proteolipid protein                                             | BP      | Cell organization and biogenesis  | Cell membrane | Structural molecular activity |
| Q076A6 | MYH1_CANFA   | Myosin-1                                                               | PF      | no annotation available           | Cytoplasm     | Binding                       |
| P49824 | MYH7_CANLF   | Myosin-7                                                               | BP      | Metabolic process                 | Cytoplasm     | Binding                       |
| Q258K2 | MYH9_CANLF   | Myosin-9                                                               | PF      | Cell communication                | Cytoplasm     | Binding                       |
| Q9TU19 | NPHP1_CANLF  | Nephrocystin-1 (Fragment)                                              | BP, SRF | Cell organization and biogenesis  | Cytoplasm     | no annotation available       |
| O02813 | NPY1R_CANLF  | Neuropeptide Y receptor type 1                                         | BP      | Metabolic process                 | Cell membrane | Receptors                     |
| O62699 | NOS2_CANLF   | Nitric oxide synthase, inducible                                       | PF, SRF | Inflammatory and defence response | Cytoplasm     | Enzyme regulatory activity    |
| Q50KA9 | NDKA_CANLF   | Nucleoside diphosphate kinase A                                        | PF      | Cell organization and biogenesis  | Nucleus       | Enzyme regulatory activity    |
| F1P7W1 | F1P7W1_CANFA | Olfactory receptor                                                     | SRF     | Cell communication                | Cell membrane | Receptors                     |
| Q95156 | OLF3_CANLF   | Olfactory receptor-like protein OLF3                                   | PF      | Cell communication                | Cell membrane | Receptors                     |
| Q8MJ04 | RP1_CANLF    | Oxygen-regulated protein 1                                             | PF      | Cell organization and biogenesis  | Cytoplasm     | Binding                       |
| Q0ZAQ8 | PPARD_CANLF  | Peroxisome proliferator-activated receptor delta                       | BP      | Cell cycle                        | Nucleus       | Binding                       |
| P80009 | PLMN_CANLF   | Plasminogen (Fragment)                                                 | BP      | Blood coagulation and haemostasis | Secreted      | Enzyme regulatory activity    |
| Q28256 | GP1BA_CANFA  | Platelet glycoprotein Ib alpha chain                                   | PF      | Blood coagulation and haemostasis | Cell membrane | Binding                       |
| Q6Q308 | PLEK_CANLF   | Pleckstrin                                                             | BP      | Cell organization and biogenesis  | Cell membrane | Enzyme regulatory activity    |
| F1PH13 | F1PH13_CANFA | Potassium channel tetramerization domain containing 8 (Submitted name) | SRF     | Cell organization and biogenesis  | Cell membrane | no annotation available       |
| Q9GLW0 | PRGR_CANLF   | Progesterone receptor                                                  | BP      | Cell cycle                        | Cytoplasm     | Receptors                     |
| Q5XXR2 | MCH_CANLF    | Pro-MCH                                                                | BP      | Cell communication                | Secreted      | Other                         |
| Q6Q7P4 | 41_CANLF     | Protein 4.1                                                            | SRF     | Cell cycle                        | Cytoplasm     | Binding                       |
| Q5PU49 | KPCD_CANLF   | Protein kinase C delta type                                            | BP      | Cell death - Apoptosis            | Cytoplasm     | Enzyme regulatory activity    |
| Q29536 | KPYR_CANLF   | Pyruvate kinase                                                        | BP      | Glycolytic process                | Cytoplasm     | Enzyme regulatory activity    |



|        |             |                                                                |        |                                  |                         |                            |
|--------|-------------|----------------------------------------------------------------|--------|----------------------------------|-------------------------|----------------------------|
| P24409 | RAB10_CANLF | Ras-related protein Rab-10                                     | BP     | Transport of ions and molecules  | Cytoplasm               | Enzyme regulatory activity |
| P61105 | RAB2A_CANLF | Ras-related protein Rab-2A                                     | BP     | Transport of ions and molecules  | Secreted                | Binding                    |
| Q5XM32 | RXFP2_CANLF | Relaxin receptor 2                                             | SRF    | Cell communication               | Cell membrane           | Receptors                  |
| Q9XSR3 | RBM47_CANLF | RNA-binding protein 47                                         | PF     | Metabolic process                | Nucleus                 | Binding                    |
| Q28263 | PDE6A_CANFA | Rod cGMP-specific 3',5'-cyclic phosphodiesterase subunit alpha | PF     | Cell communication               | Cell membrane           | Enzyme regulatory activity |
| O46674 | AT2A2_CANLF | Sarcoplasmic/endoplasmic reticulum calcium ATPase 2            | PF     | Transport of ions and molecules  | Cytoplasm               | Enzyme regulatory activity |
| P06871 | TRY1_CANLF  | Serine Protease 1                                              | BP     | Metabolic process                | Secreted                | Enzyme regulatory activity |
| P49822 | ALBU_CANLF  | Serum albumin                                                  | BP     | Transport of ions and molecules  | Secreted                | Binding                    |
| P54832 | PON2_CANFA  | Serum paraoxonase/arylesterase 2                               | BP, PF | no annotation available          | Cell membrane           | Enzyme regulatory activity |
| P61010 | SRP54_CANLF | Signal recognition particle 54 kDa protein                     | BP     | Cell communication               | Cytoplasm               | Binding                    |
| Q75W64 | AICDA_CANLF | Single-stranded DNA cytosine deaminase                         | SRF    | Cell cycle                       | Nucleus                 | Enzyme regulatory activity |
| P23685 | NAC1_CANLF  | Sodium/calcium exchanger 1                                     | SRF    | Transport of ions and molecules  | Cell membrane           | Binding                    |
| P50997 | AT1A1_CANLF | Sodium/potassium-transporting ATPase subunit alpha-1           | BP     | Transport of ions and molecules  | Cell membrane           | Enzyme regulatory activity |
| Q5WR10 | DX39B_CANLF | Spliceosome RNA helicase DDX39B                                | BP     | Transport of ions and molecules  | Nucleus                 | Enzyme regulatory activity |
| Q6Y4Q5 | MMP3_CANFA  | Stromelysin-1                                                  | PF     | Metabolic process                | Secreted                | Enzyme regulatory activity |
| Q9TTW3 | TEKT1_CANLF | Tektin-1                                                       | SRF    | Other                            | Cytoplasm               | no annotation available    |
| A0M8U6 | TES_CANLF   | Testin                                                         | PF     | Cell organization and biogenesis | Cytoplasm               | Binding                    |
| A8C750 | THADA_CANLF | Thyroid adenoma-associated protein homolog                     | SRF    | Metabolic process                | no annotation available | no annotation available    |
| Q8HYB7 | PERT_CANLF  | Thyroid peroxidase                                             | SRF    | Metabolic process                | Cell membrane           | Enzyme regulatory activity |

|        |              |                                                                  |        |                                   |                         |                               |
|--------|--------------|------------------------------------------------------------------|--------|-----------------------------------|-------------------------|-------------------------------|
| O62683 | ZO3_CANLF    | Tight junction protein ZO-3                                      | BP, PF | Cell communication                | Cell membrane           | Binding                       |
| Q5I2M8 | TLR9_CANLF   | Toll-like receptor 9                                             | SRF    | Inflammatory and defence response | Cytoplasm               | Receptors                     |
| Q697L1 | TRPV1_CANLF  | Transient receptor potential cation channel subfamily V member 1 | BP     | Transport of ions and molecules   | Cell membrane           | Binding                       |
| F1PAB2 | F1PAB2_CANFA | Transport and Golgi organization 6 homolog (Submitted name)      | SRF    | Other                             | no annotation available | no annotation available       |
| P54714 | TPIS_CANLF   | Triosephosphate isomerase                                        | PF     | Glycolytic process                | Cytoplasm               | Enzyme regulatory activity    |
| E2RDV1 | TDRD7_CANLF  | Tudor domain-containing protein 7                                | BP     | Cell cycle                        | Cytoplasm               | Binding                       |
| P63050 | RL40_CANLF   | Ubiquitin-60S ribosomal protein L40                              | BP, PF | Cell cycle                        | Cytoplasm               | Structural molecular activity |
| Q5TJF0 | VPS52_CANLF  | Vacuolar protein sorting-associated protein 52 homolog           | BP     | Transport of ions and molecules   | Cell membrane           | Binding                       |
| Q9N1T2 | RPGR_CANFA   | X-linked retinitis pigmentosa GTPase regulator                   | PF     | Cell organization and biogenesis  | Cytoplasm               | Other                         |
| Q5QQ50 | XYLT2_CANLF  | Xylosyltransferase 2                                             | PF     | Metabolic process                 | Secreted                | Enzyme regulatory activity    |
| Q9XSR1 | ZN252_CANLF  | Zinc finger protein                                              | BP     | Cell cycle                        | Nucleus                 | Binding                       |
| Q5TJF6 | S39A7_CANLF  | Zinc transporter SLC39A7                                         | PF     | Transport of ions and molecules   | Cell membrane           | Other                         |

1: BP: blood plasma, PF: prostatic fraction, SRF: sperm-rich fraction.
